# Supplementary material
Source: PubMed Central journal article supplement (PMC7113410)
Supplement: JCP-25-001_Supple.pdf [file JCP-25-001_Supple.pdf]

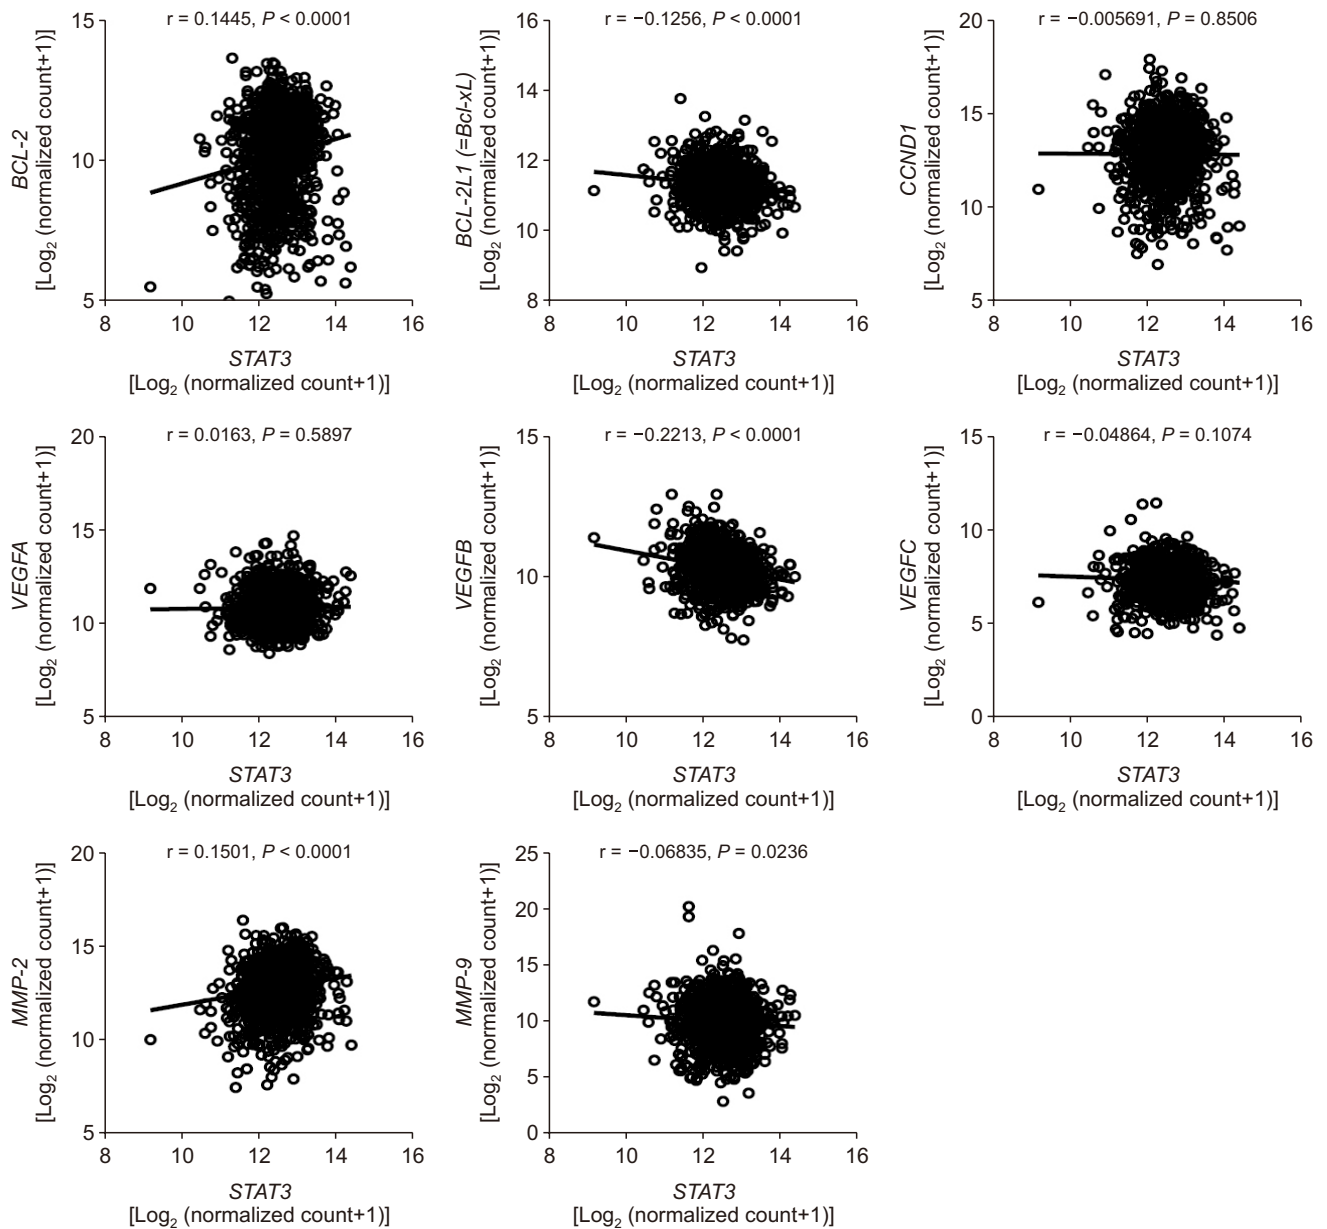

**Figure S1.** Association of *STAT3* expression with that of *Bcl-2*, *Bcl-xL* (*BCL2L1*), *Cyclin D1* (*CCND1*), *VEGF*, *matrix metalloproteinase (MMP)-2*, and *MMP-9* was determined from the breast cancer RNA-Seq data from The Cancer Genome Atlas Pearson test was used to determine the correlation coefficient and statistical significance.
